# Supplementary material
Source: PubMed Central journal article supplement (PMC7467641)
Supplement: ct0c00154_si_001.pdf [file ct0c00154_si_001.pdf]

# A New Benchmark Set for Excitation Energy of Charge Transfer States: Systematic Investigation of Coupled-Cluster Type Methods

Balázs Kozma,<sup>†</sup> Attila Tajti,<sup>\*,†</sup> Baptiste Demoulin,<sup>‡</sup> Róbert Izsák,<sup>‡</sup> Marcel Nooijen,<sup>¶</sup> and Péter G. Szalay<sup>\*,†</sup>

<sup>†</sup>*ELTE Eötvös Loránd University, Institute of Chemistry, Laboratory of Theoretical Chemistry, , P. O. Box 32, H-1518, Budapest 112, Hungary*

<sup>‡</sup>*Max-Planck-Institut für Kohlenforschung, , Mülheim an der Ruhr, Germany*

<sup>¶</sup>*Department of Chemistry, University of Waterloo , Waterloo, Ontario N2L 3G1, Canada*

E-mail: tat@chem.elte.hu; szalay@chem.elte.hu

Table 1: coordinates in Angstrom (cont. 1)

Ammonia-fluor

|   |           |           |           |
|---|-----------|-----------|-----------|
| H | 2.490675  | 0.939499  | -0.000156 |
| N | 2.085280  | 0.000000  | 0.000003  |
| H | 2.490739  | -0.469633 | 0.813668  |
| H | 2.490627  | -0.469860 | -0.813586 |
| F | -0.222963 | 0.000000  | 0.000001  |
| F | -1.710402 | 0.000000  | 0.000000  |

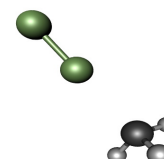

Aceton-fluor

|   |           |           |           |
|---|-----------|-----------|-----------|
| H | -2.543489 | 0.848415  | -1.328942 |
| C | -1.483454 | 0.544023  | -1.289081 |
| H | -0.874751 | 1.463810  | -1.326362 |
| H | -1.243732 | -0.093252 | -2.152254 |
| C | -1.199386 | -0.211141 | 0.000000  |
| O | -0.766094 | -1.362999 | 0.000000  |
| C | -1.483454 | 0.544023  | 1.289082  |
| H | -1.243732 | -0.093253 | 2.152254  |
| H | -0.874757 | 1.463813  | 1.326367  |
| H | -2.543491 | 0.848408  | 1.328938  |
| F | 1.631766  | 0.853847  | 0.000000  |
| F | 2.139396  | -0.495631 | 0.000000  |

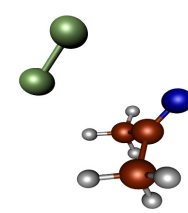

Pyrazine-fluor

|   |           |           |           |
|---|-----------|-----------|-----------|
| N | 0.995753  | 1.433963  | 0.000000  |
| C | 0.995753  | 0.702984  | 1.137230  |
| C | 0.995753  | -0.702984 | 1.137230  |
| N | 0.995753  | -1.433963 | 0.000000  |
| C | 0.995753  | -0.702984 | -1.137230 |
| C | 0.995753  | 0.702984  | -1.137230 |
| H | 0.995753  | 1.261352  | 2.081529  |
| H | 0.995753  | -1.261351 | 2.081529  |
| H | 0.995753  | -1.261352 | -2.081529 |
| H | 0.995753  | 1.261351  | -2.081529 |
| F | -2.097479 | 0.721626  | 0.000000  |
| F | -2.097479 | -0.721626 | 0.000000  |

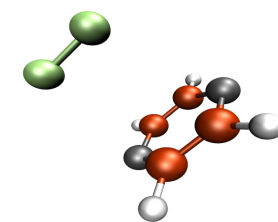

**Table 2: coordinates in Angstrom (cont. 2)**

Aceton-nitromethane

|   |           |           |           |
|---|-----------|-----------|-----------|
| H | 1.811829  | 0.246785  | 1.837687  |
| C | 2.341053  | 0.546375  | 0.917315  |
| H | 3.348706  | 0.098100  | 0.941832  |
| H | 2.413351  | 1.642596  | 0.878699  |
| C | 1.569262  | 0.038569  | -0.286392 |
| O | 1.118023  | 0.805512  | -1.143722 |
| C | 1.383099  | -1.464592 | -0.377435 |
| H | 0.813573  | -1.715706 | -1.283526 |
| H | 2.363599  | -1.969922 | -0.390703 |
| H | 0.830656  | -1.814945 | 0.510807  |
| C | -1.970874 | 1.149505  | -0.504785 |
| H | -1.152760 | 1.388024  | -1.196400 |
| H | -2.893231 | 0.879281  | -1.034661 |
| H | -2.130317 | 1.966927  | 0.210009  |
| N | -1.514242 | -0.049172 | 0.261983  |
| O | -0.842687 | 0.159540  | 1.295692  |
| O | -1.782949 | -1.169899 | -0.222646 |

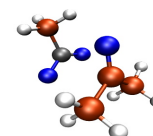

Ammonia-oxygen-difluorid

|   |           |           |           |
|---|-----------|-----------|-----------|
| N | -2.420290 | -0.000734 | -0.132257 |
| H | -1.815288 | -0.803134 | 0.063560  |
| H | -1.818726 | 0.804803  | 0.061262  |
| H | -3.083243 | 0.003370  | 0.647931  |
| O | 0.983746  | 0.000141  | -0.561705 |
| F | 0.656308  | -1.133526 | 0.264727  |
| F | 0.655717  | 1.133681  | 0.264666  |

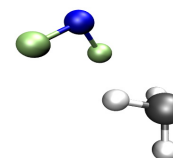

Ammonia-pyrazine

|   |           |           |           |
|---|-----------|-----------|-----------|
| N | 0.551070  | 1.435370  | 0.000026  |
| C | 0.551176  | 0.702702  | 1.134927  |
| C | 0.551384  | -0.702642 | 1.134899  |
| N | 0.551493  | -1.435265 | -0.000032 |
| C | 0.551386  | -0.702589 | -1.134927 |
| C | 0.551179  | 0.702756  | -1.134889 |
| H | 0.551093  | 1.259441  | 2.080741  |
| H | 0.551464  | -1.259418 | 2.080691  |
| H | 0.551470  | -1.259320 | -2.080746 |
| H | 0.551098  | 1.259531  | -2.080682 |
| N | -2.516082 | -0.000399 | -0.000002 |
| H | -2.940485 | 0.466335  | -0.807243 |
| H | -2.940280 | -0.932952 | 0.000820  |
| H | -2.940487 | 0.467759  | 0.806414  |

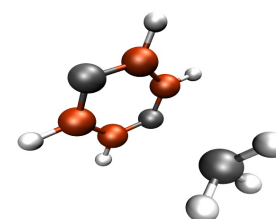

**Table 3: coordinates in Angstrom (cont. 3)**

Pyrrole-pyrazine (H-bond)

|   |           |           |           |
|---|-----------|-----------|-----------|
| N | -1.116277 | -0.000150 | 0.019717  |
| C | -1.840966 | 1.141214  | 0.010095  |
| C | -3.246427 | 1.141801  | -0.008562 |
| N | -3.972069 | 0.001043  | -0.018193 |
| C | -3.248391 | -1.140963 | -0.008585 |
| C | -1.842932 | -1.142795 | 0.010072  |
| H | -1.279558 | 2.083082  | 0.017546  |
| H | -3.807049 | 2.084137  | -0.016006 |
| H | -3.810634 | -2.082333 | -0.016048 |
| H | -1.282199 | -2.085066 | 0.017517  |
| N | 1.906183  | -0.000072 | 0.015242  |
| C | 2.699989  | 1.126323  | 0.003913  |
| C | 2.700047  | -1.126427 | 0.003917  |
| C | 4.034805  | 0.715035  | -0.015132 |
| C | 4.034842  | -0.715070 | -0.015130 |
| H | 0.879481  | -0.000601 | 0.029892  |
| H | 2.260267  | 2.123953  | 0.010185  |
| H | 2.260376  | -2.124079 | 0.010193  |
| H | 4.904166  | 1.372849  | -0.027538 |
| H | 4.904236  | -1.372840 | -0.027534 |

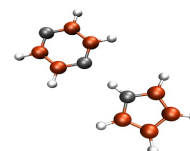

Pyrrole-pyrazine (stacked)

|   |           |           |           |
|---|-----------|-----------|-----------|
| H | 2.068365  | -1.554770 | -1.258236 |
| H | -2.068564 | -1.553940 | -1.258236 |
| H | 2.068365  | -1.554770 | 1.258236  |
| H | -2.068564 | -1.553940 | 1.258236  |
| C | 1.135821  | -1.554583 | -0.697884 |
| C | -1.136020 | -1.554127 | -0.697884 |
| C | 1.135821  | -1.554583 | 0.697884  |
| C | -1.136020 | -1.554127 | 0.697884  |
| N | -0.000100 | -1.554355 | -1.417402 |
| N | -0.000100 | -1.554355 | 1.417402  |
| H | -0.770304 | 1.855801  | -2.114612 |
| H | -0.770304 | 1.855801  | 2.114612  |
| H | 1.850809  | 1.855275  | -1.358585 |
| H | 1.850809  | 1.855275  | 1.358585  |
| H | -2.130086 | 1.856074  | 0.000000  |
| C | -0.333285 | 1.855713  | -1.125828 |
| C | -0.333285 | 1.855713  | 1.125828  |
| C | 0.985374  | 1.855448  | -0.709235 |
| C | 0.985374  | 1.855448  | 0.709235  |
| N | -1.119278 | 1.855871  | 0.000000  |

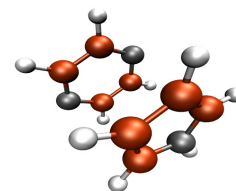

**Table 4: coordinates in Angstrom (cont. 4)**

Tetrafluor-ethylene-ethylene (3.5 Å)

|   |           |           |           |
|---|-----------|-----------|-----------|
| F | -1.394866 | -1.110938 | -0.741831 |
| F | -1.394866 | 1.110938  | -0.741831 |
| F | 1.394866  | -1.110938 | -0.741831 |
| F | 1.394866  | 1.110938  | -0.741831 |
| C | -0.667784 | 0.000000  | -0.759941 |
| C | 0.667784  | 0.000000  | -0.759941 |
| H | -1.244242 | 0.935429  | 2.658551  |
| H | -1.244242 | -0.935429 | 2.658551  |
| H | 1.244242  | 0.935429  | 2.658551  |
| H | 1.244242  | -0.935429 | 2.658551  |
| C | -0.674558 | 0.000000  | 2.662317  |
| C | 0.674558  | 0.000000  | 2.662317  |

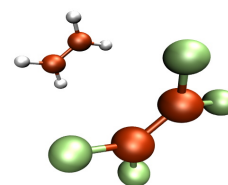

Tetrafluor-ethylene-ethylene (5 Å)

|   |           |           |           |
|---|-----------|-----------|-----------|
| F | -1.394866 | -1.110938 | -1.070259 |
| F | -1.394866 | 1.110938  | -1.070259 |
| F | 1.394866  | -1.110938 | -1.070259 |
| F | 1.394866  | 1.110938  | -1.070259 |
| C | -0.667784 | 0.000000  | -1.088369 |
| C | 0.667784  | 0.000000  | -1.088369 |
| H | -1.244242 | 0.935429  | 3.830123  |
| H | -1.244242 | -0.935429 | 3.830123  |
| H | 1.244242  | 0.935429  | 3.830123  |
| H | 1.244242  | -0.935429 | 3.830123  |
| C | -0.674558 | 0.000000  | 3.833889  |
| C | 0.674558  | 0.000000  | 3.833889  |
